# Supplementary material for: Insight into the Potential of Somatostatin Vaccination with Goats as a Model: From a Perspective of the Gastrointestinal Microbiota
Source: MDPI journal article supplement (doi:10.3390/ani15050728), 2025-03-04
Supplement: s1 [file animals-3396125-supplementary.pdf › animals-3396125-supplementary.pdf]

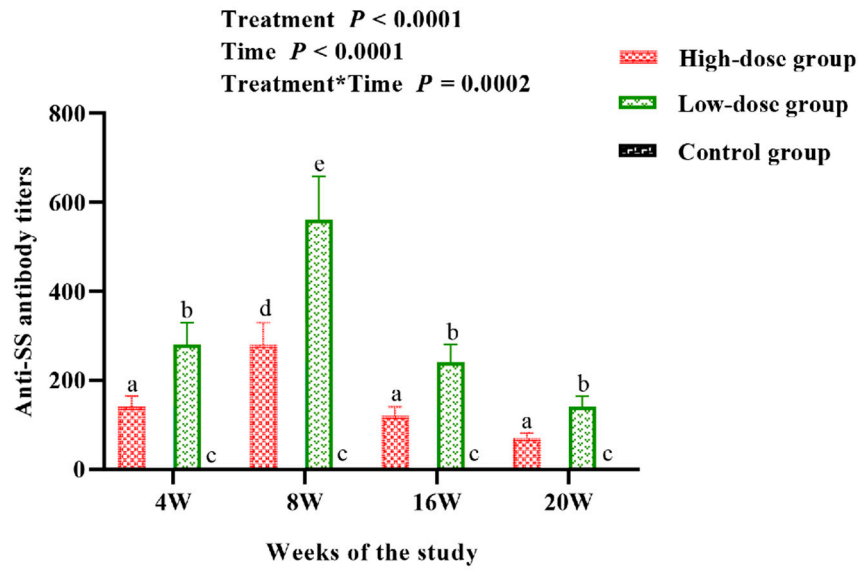

**Figure S1.** Anti-SS antibody titres in the different dose somatostatin. Data are expressed as mean  $\pm$  SEM. Different letters between groups represented significant differences.

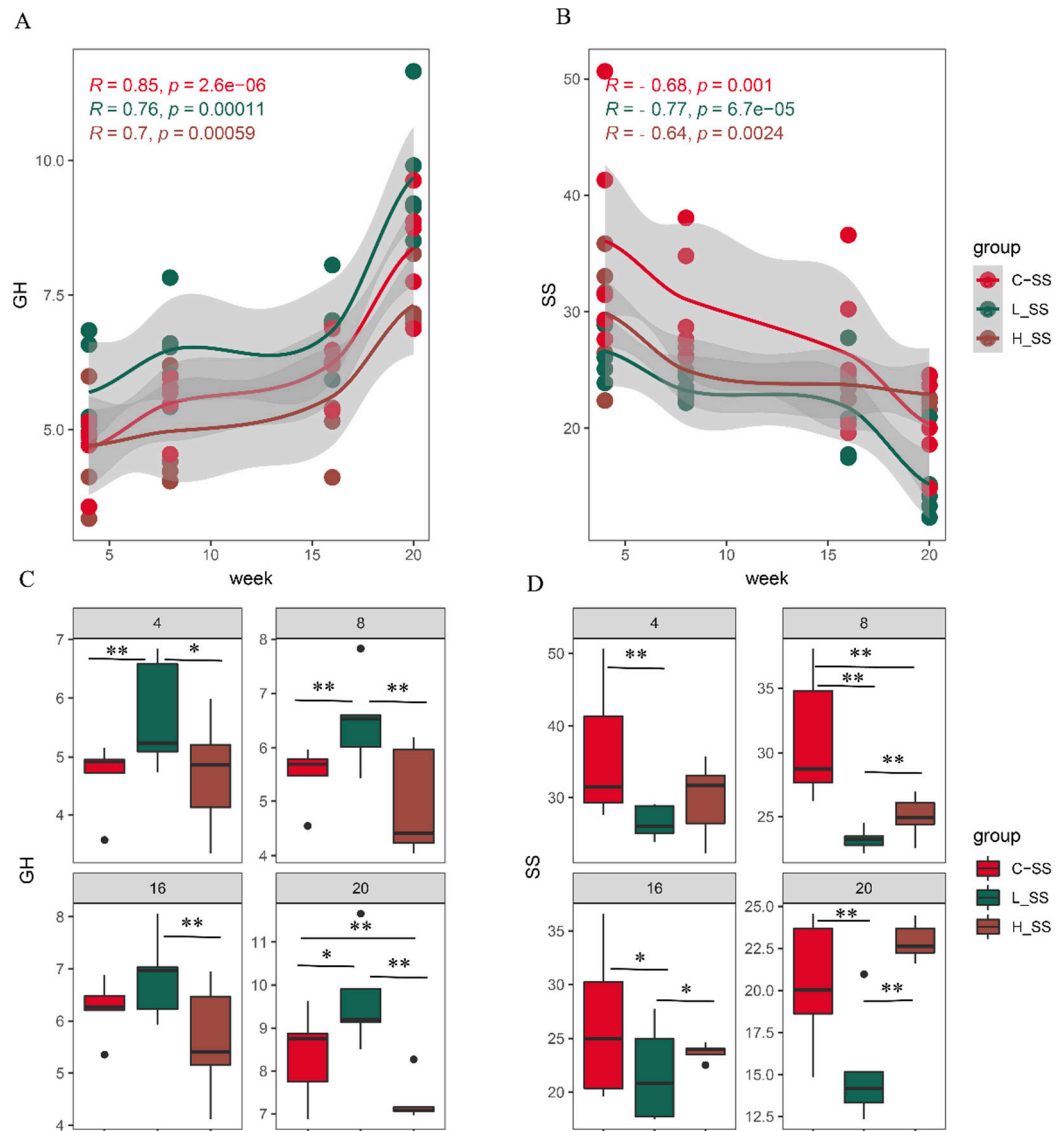

**Figure S2.** The somatostatin vaccination changing the hormone levels of serum in goats. A. Linear regression analysis of the concentration of growth hormone (GH) in serum of goats with different dose vaccine; B. Linear regression analysis of the concentration of somatostatin (SS) in serum of goats with different dose vaccine; C. The GH concentration of serum among three groups at week 4, 8, 16 and 20; D. The SS concentration of serum among three groups at week 4, 8, 16 and 20. C\_SS: control group; L\_SS: low dose group; H\_SS: high dose group; Significance was tested using independent one-way Anova or T-test. Asterisks denote significant p values: NS.  $P > 0.05$ ,  $*P < 0.05$ ,  $**P < 0.01$ ,  $n = 5/\text{group}$ .

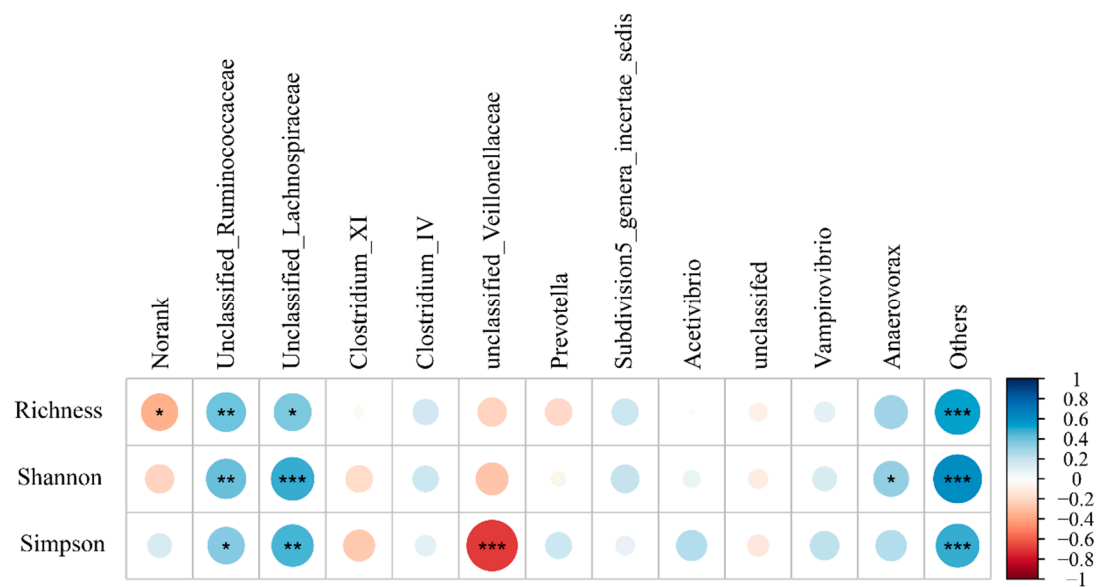

**Figure S3.** The correlation between alpha diversity indices and specific bacterial taxa. Asterisks denote significant p values: NS.  $P > 0.05$ ,  $*P < 0.05$ ,  $**P < 0.01$ ,  $***P < 0.001$ .

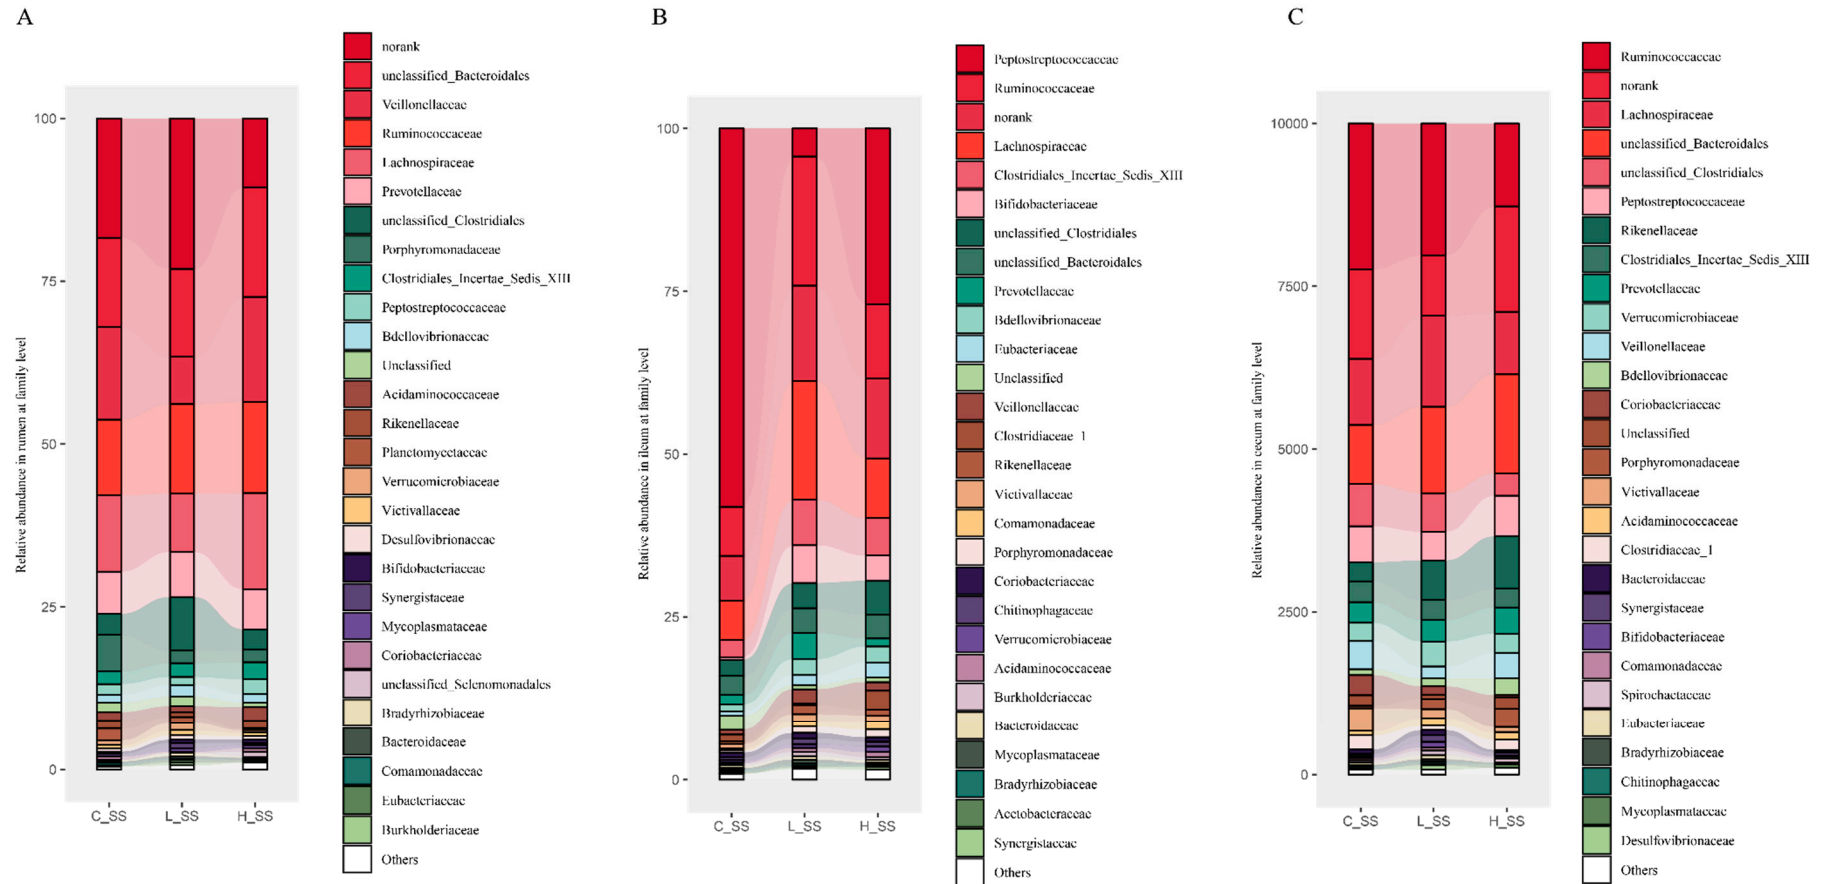

**Figure S4.** The profile of dominant family in rumen (A), ileum (B) and cecum (C) of goat vaccinates different dose somatostatin. C\_SS: control group; L\_SS: low dose group; H\_SS: high dose group.
